# Supplementary material for: In situ grown MnO2/graphdiyne oxide hybrid 3D nanoflowers for high-performance aqueous zinc-ion batteries
Source: Royal Society of Chemistry journal article supplement (doi:10.1039/d1qm00548k), 2021-01-01
Supplement: d1qm00548k1.pdf [file d1qm00548k1.pdf]

## Supporting Information

### In-situ grown MnO<sub>2</sub>/Graphdiyne oxide hybrid 3D nanoflowers for high performance aqueous zinc-ion batteries

Fuhui Wang,<sup>a, b</sup> Weiyue Jin,<sup>a, b</sup> Zecheng Xiong,<sup>a, b</sup> Huibiao Liu<sup>✉a, b</sup>

<sup>a</sup> Beijing National Laboratory for Molecular Sciences, CAS Research/Education Center for Excellence in Molecular Sciences, CAS Key Laboratory of Organic Solids, Institute of Chemistry, Chinese Academy of Sciences, Beijing 100190, P. R. China.

<sup>b</sup> University of Chinese Academy of Sciences, Beijing 100049, P. R. China

E-mail: liuhb@iccas.as.cn

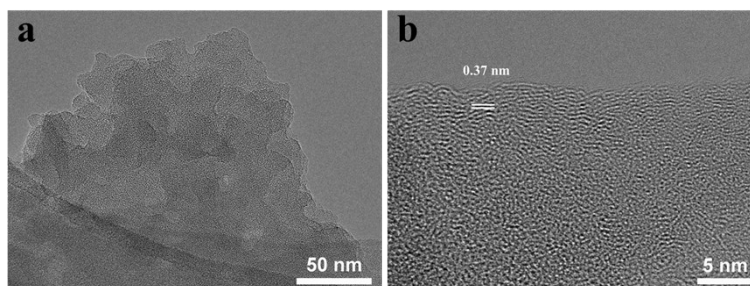

**Fig. S1** (a) TEM and (b) HR-TEM images of GDYO nanosheet.

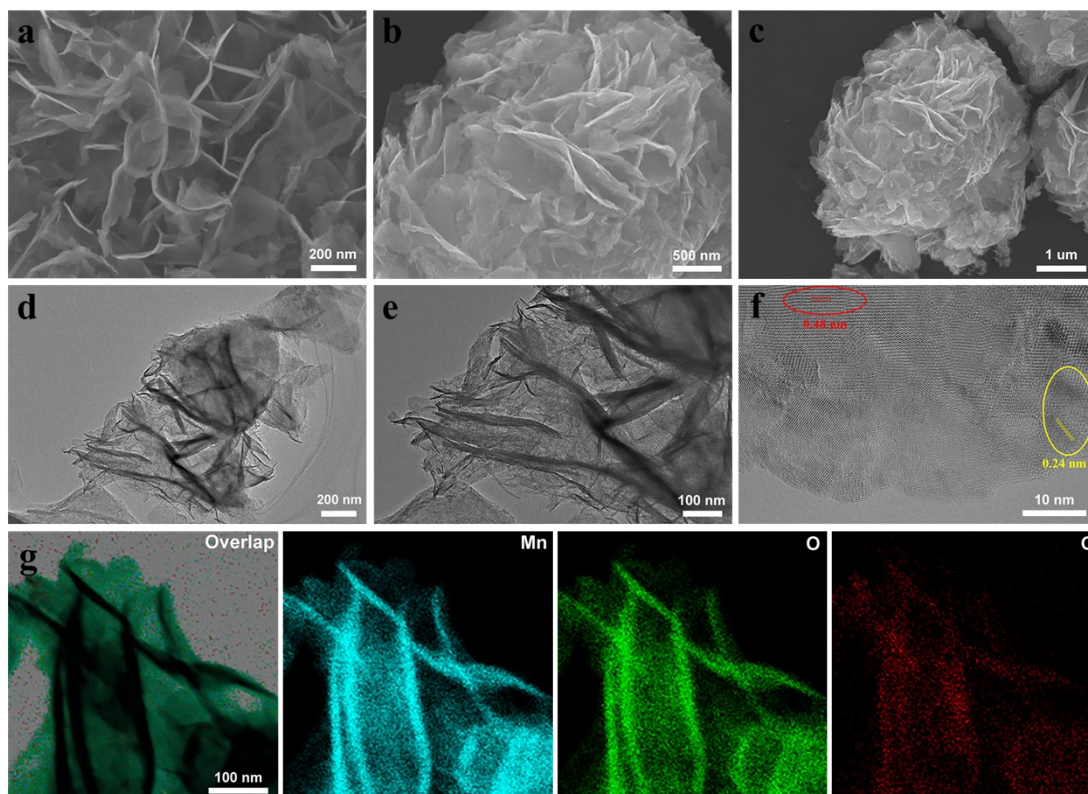

**Fig. S2** Microstructural and compositional analysis of  $\text{MnO}_2@10\text{GDYO}$  hybrid 3D nanoflowers. (a-c) SEM images. (d-e) TEM images. (f) HR-TEM image and (g) elemental mapping images of Mn, O and C.

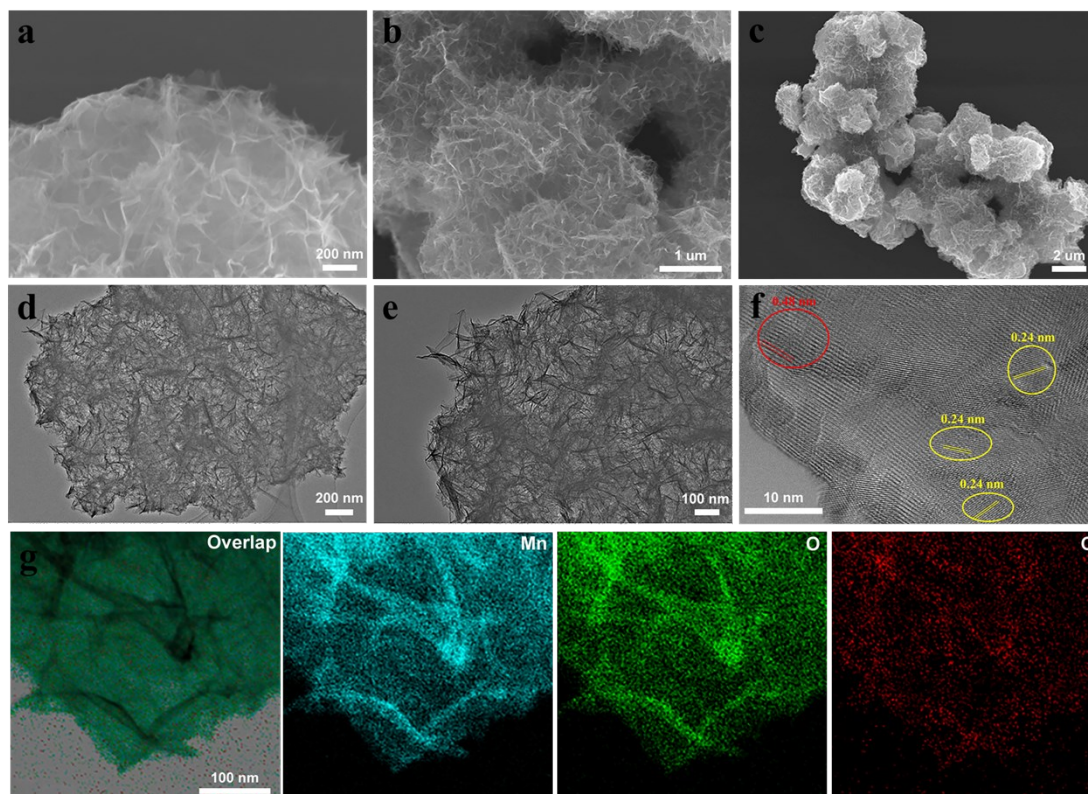

**Fig. S3** Microstructural and compositional analysis of MnO<sub>2</sub>@20GDYO hybrid 3D nanoflowers. (a-c) SEM images. (d-e) TEM images. (f) HR-TEM image and (g) elemental mapping images of Mn, O and C.

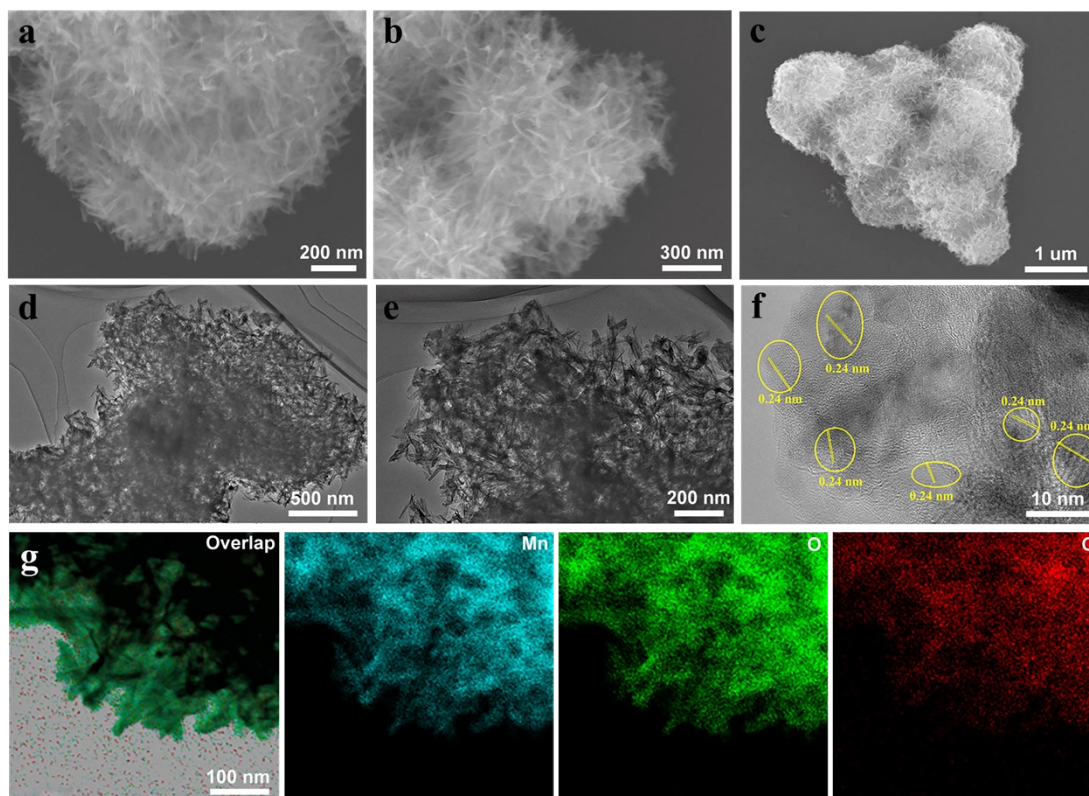

**Fig. S4** Microstructural and compositional analysis of  $\text{MnO}_2@100\text{GDYO}$  hybrid 3D nanoflowers. (a-c) SEM images. (d-e) TEM images. (f) HR-TEM image and (g) elemental mapping images of Mn, O and C.

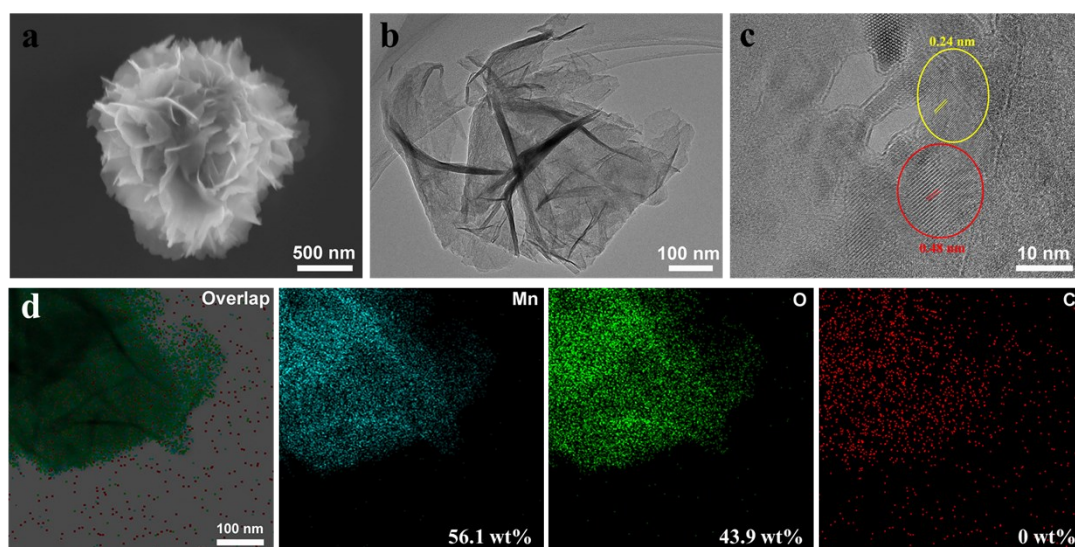

**Fig. S5** Microstructural and compositional analysis of  $\text{MnO}_2$ . (a) SEM image. (b) TEM image. (c) HR-TEM image and (d) elemental mapping images of Mn, O and C.

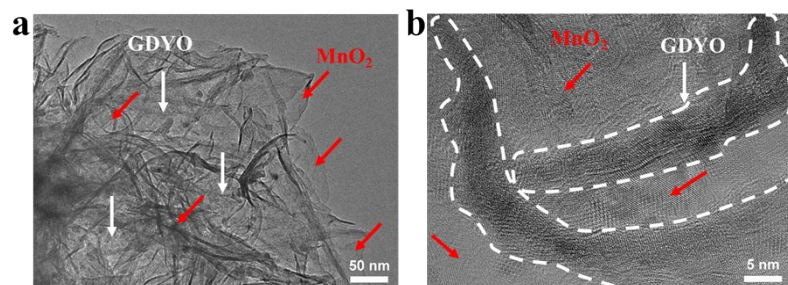

**Fig. S6** (a) TEM and (b) HR-TEM images of MnO<sub>2</sub>@50GDYO hybrid 3D nanoflowers.

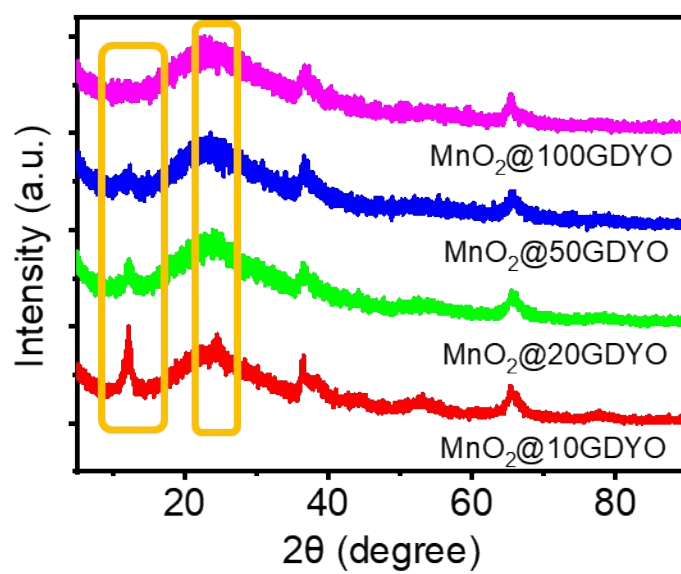

**Fig. S7** XRD patterns of MnO<sub>2</sub>@GDYO hybrid 3D nanoflowers.

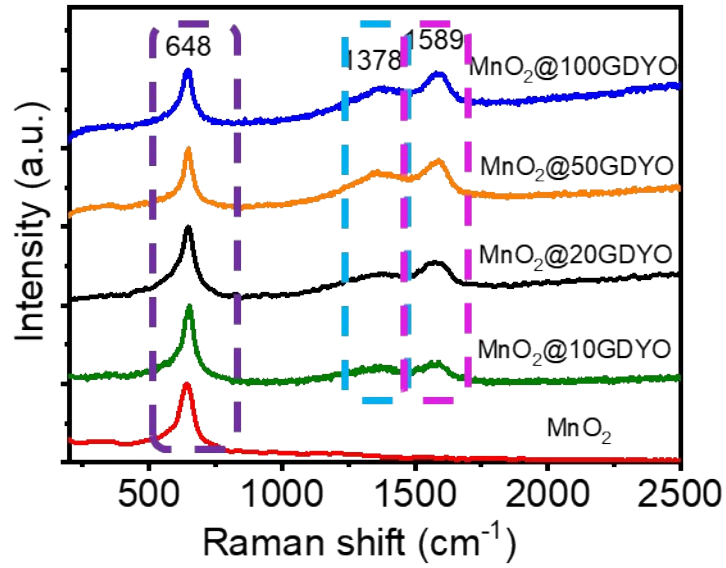

**Fig. S8** Raman spectra of  $\text{MnO}_2$  and  $\text{MnO}_2$ @GDYO hybrid 3D nanoflowers.

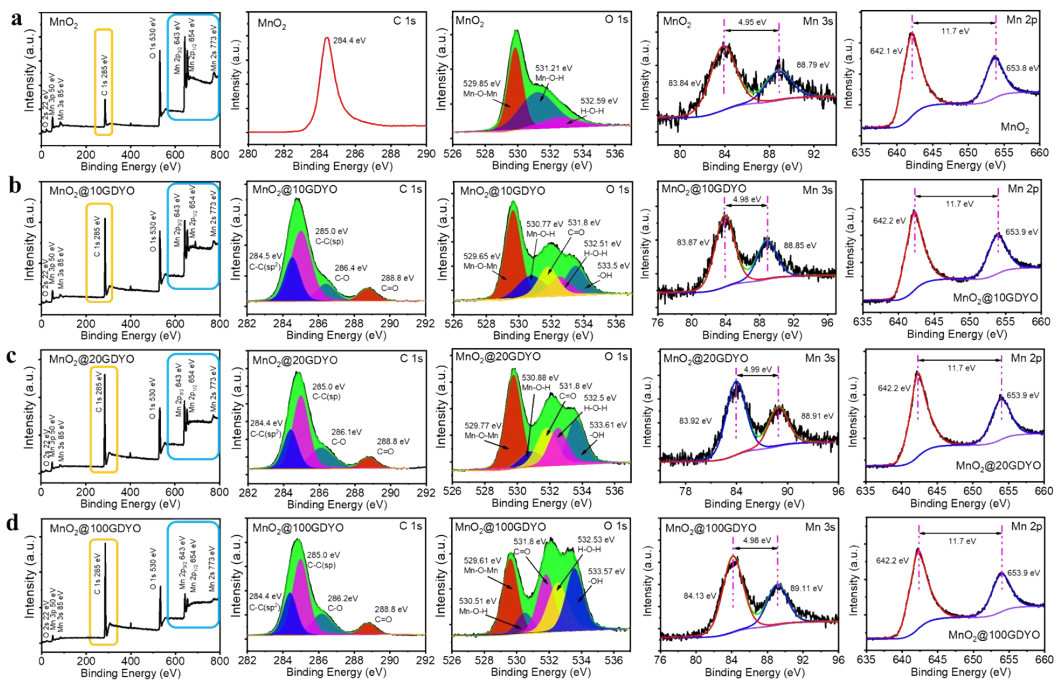

**Fig. S9** XPS spectra of  $\text{MnO}_2$  and  $\text{MnO}_2$ @GDYO hybrid 3D nanoflowers. (a-d) Survey scan and narrow scan for element C, O, Mn.

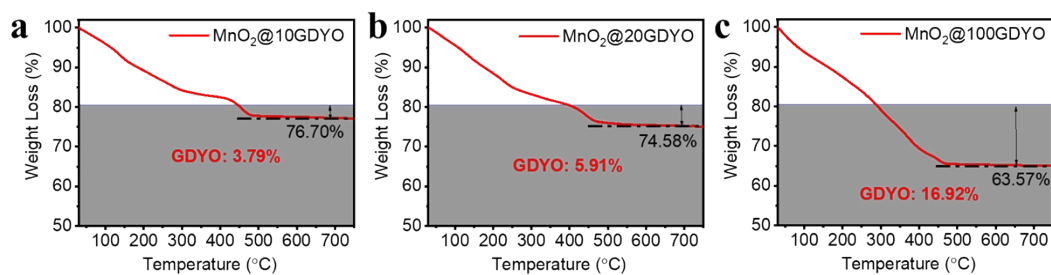

**Fig. S10** TGA curves of (a)  $\text{MnO}_2@10\text{GDYO}$ , (b)  $\text{MnO}_2@20\text{GDYO}$  and (c)  $\text{MnO}_2@100\text{GDYO}$  hybrid 3D nanoflowers.

**Tab. S1** Comparison of specific surface area of  $\text{MnO}_2$  with different synthetic methods and morphologies

| Materials                        | Preparation            | Morphology     | Specific surface area ( $\text{m}^2 \text{g}^{-1}$ ) | Ref.      |
|----------------------------------|------------------------|----------------|------------------------------------------------------|-----------|
| $\text{MnO}_2$                   | solvothermal           | nanowires      | 81.9                                                 | 1         |
| $\text{N-CNSs}@ \text{MnO}_2$    | hydrothermal           | nanoflakes     | 7.3                                                  | 2         |
| $\text{MnO}_2$ -CNTs/CNHs        | mechanical mixing      | nanosheets     | 99.04                                                | 3         |
| $\text{MnO}_2/\text{rGO}$        | vacuum filtration      | nanowires      | 159.9                                                | 4         |
| $\alpha\text{-MnO}_2/\text{CNT}$ | chemical precipitation | microspheres   | 119.3                                                | 5         |
| HMs $\text{MnO}_2$               | chemical precipitation | nanospheres    | 178                                                  | 6         |
| $\beta\text{-MnO}_2$             | microwave hydrothermal | nanofibers     | □68                                                  | 7         |
| Graphene- $\text{MnO}_2$         | hydrothermal           | nanotube       | 136.2                                                | 8         |
| $\text{MnO}_2@50\text{GDYO}$     | in-situ induced        | 3D nanoflowers | 204.83                                               | This work |

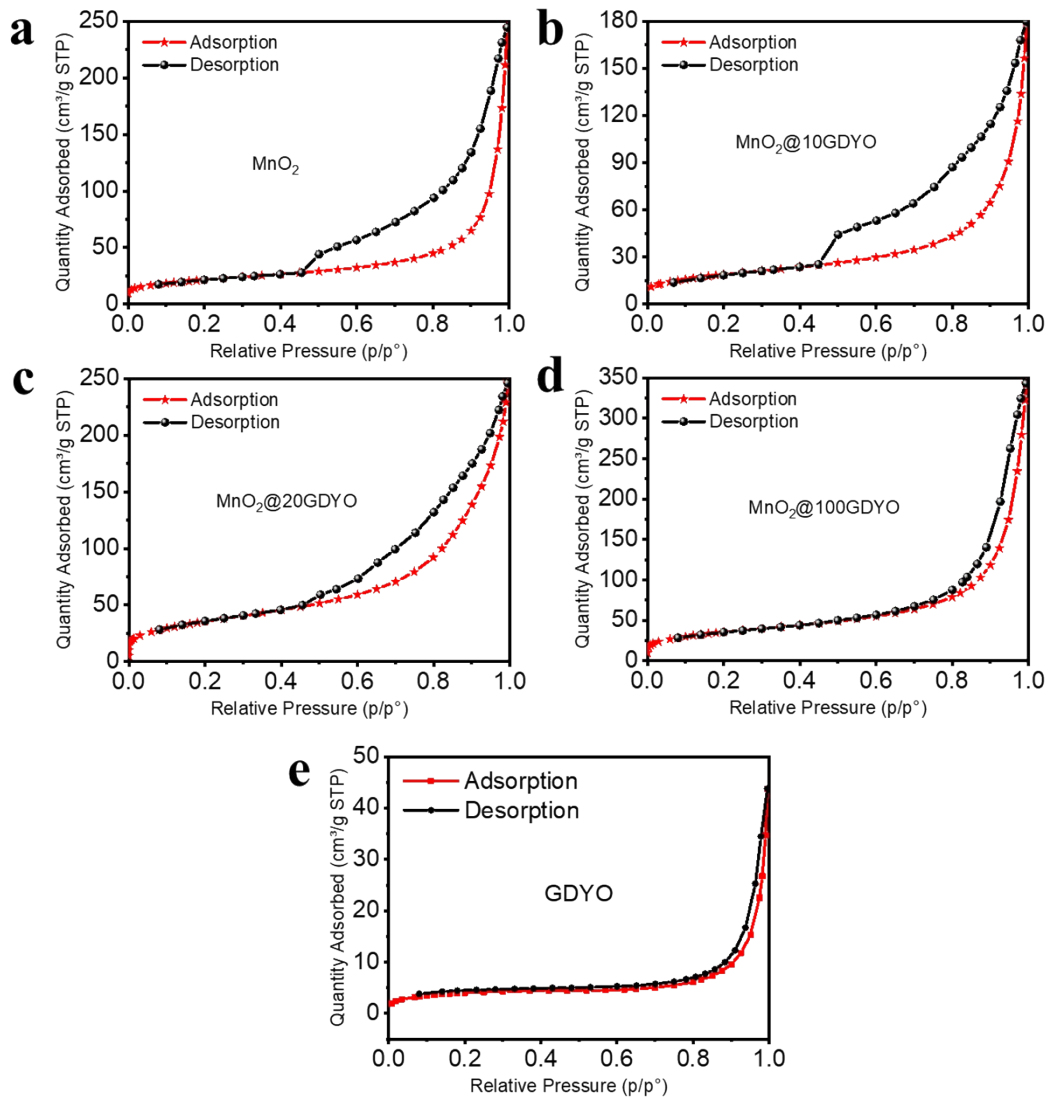

**Fig. S11** Nitrogen adsorption-desorption isotherms of (a)  $\text{MnO}_2$ , (b)  $\text{MnO}_2@10\text{GDYO}$ , (c)  $\text{MnO}_2@20\text{GDYO}$ , (d)  $\text{MnO}_2@100\text{GDYO}$  hybrid 3D nanoflowers and (e) GDYO at 77 K.

The BET specific surface area of GDYO is  $14.7253 \text{ m}^2 \text{ g}^{-1}$ , according to the Nitrogen adsorption-desorption isotherm.



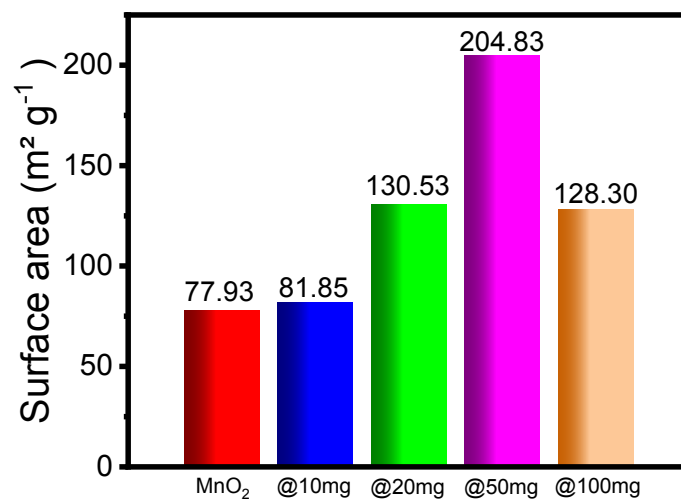

**Fig. S12** Specific surface area of MnO<sub>2</sub> and MnO<sub>2</sub>@GDYO hybrid 3D nanoflowers.

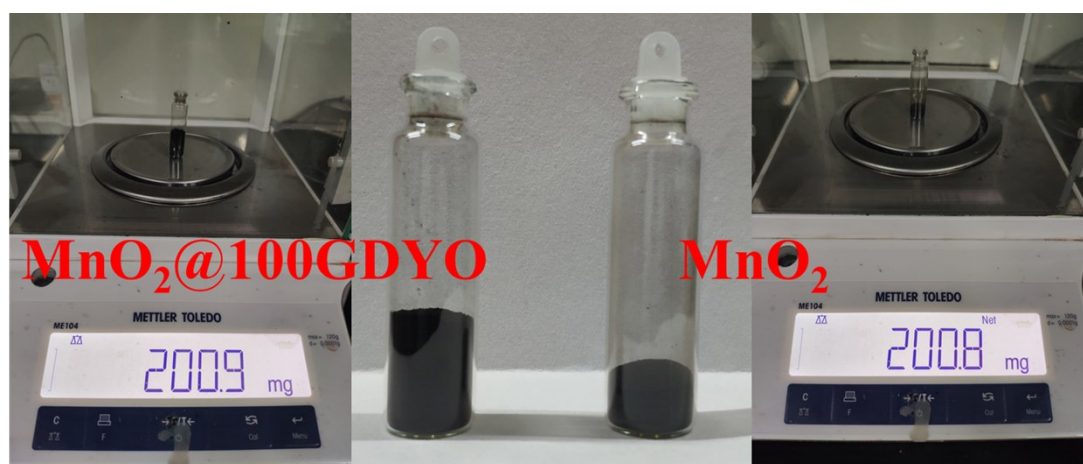

**Fig. S13** Photographs of MnO<sub>2</sub> and MnO<sub>2</sub>@100GDYO samples with approximate weight.

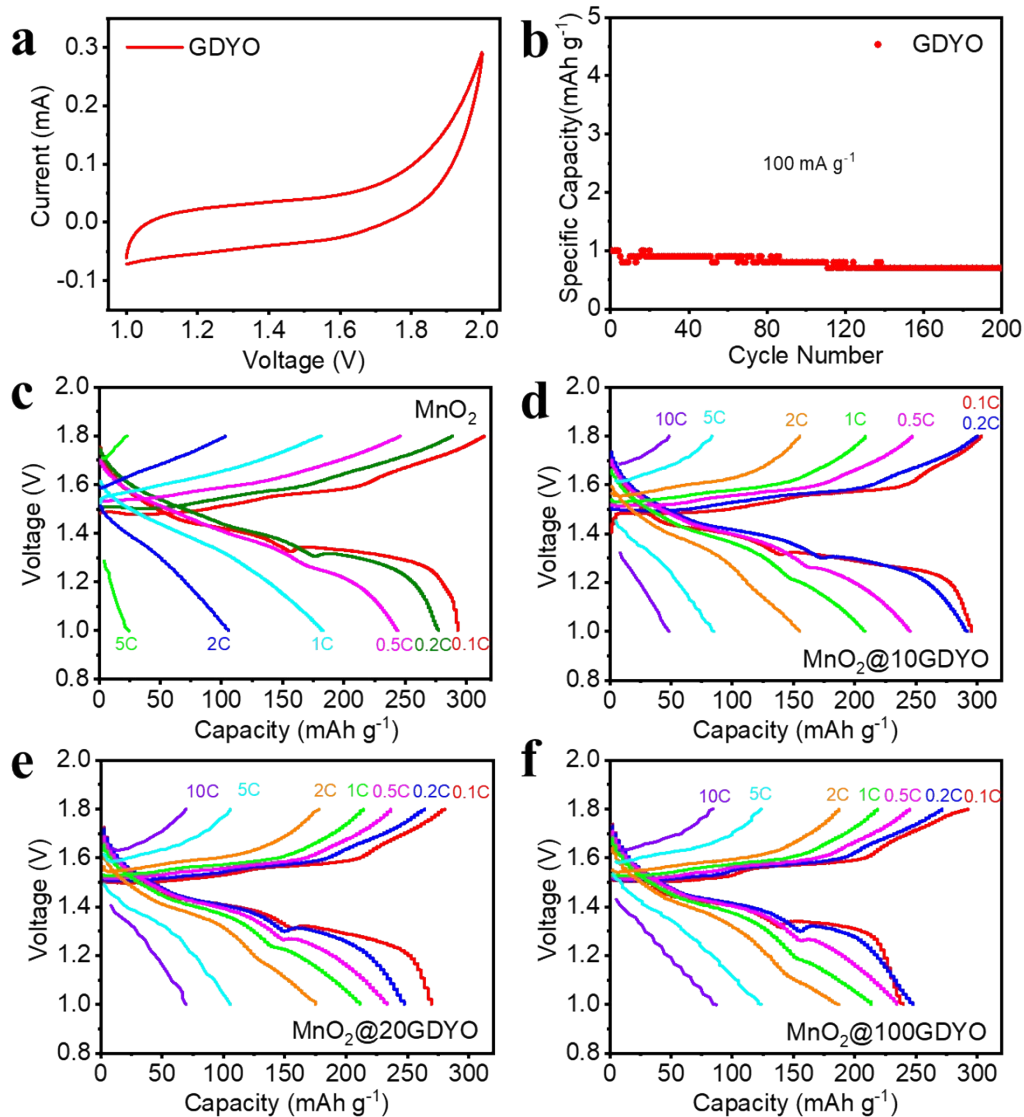

**Fig. S14** (a) CV curves of GDYO at  $0.1 \text{ mV s}^{-1}$ . (b) Cycle performances of GDYO at  $100 \text{ mA h g}^{-1}$ . Charge and discharge curves of (c)  $\text{MnO}_2$ , (d)  $\text{MnO}_2@10\text{GDYO}$ , (e)  $\text{MnO}_2@20\text{GDYO}$  and (f)  $\text{MnO}_2@100\text{GDYO}$  electrodes at current densities ranging from 0.1 to 10 C.

It can be seen from the CV curve of GDYO that there is no redox peak in the voltage range of 1 - 2V, and the current increase when the voltage is greater than 1.8V is caused by the decomposition of the electrolyte. The specific capacity of GDYO tested at current density of  $100 \text{ mA g}^{-1}$  is approximately  $1 \text{ mA h g}^{-1}$ , which is negligible. Therefore, it is concluded that the GDYO has no capacity contribution to zinc ion storage.

**Tab. S2** Comparison of reported  $\text{MnO}_2$  cathode materials for Zn-ion batteries

| Materials                               | Low-rate capacity<br>(mA h g <sup>-1</sup> ) | High-rate capacity<br>(mA h g <sup>-1</sup> ) | Capacity retention | Cycling stability                               | Ref.      |
|-----------------------------------------|----------------------------------------------|-----------------------------------------------|--------------------|-------------------------------------------------|-----------|
| Graphene-MnO <sub>2</sub>               | 321 (48 mA g <sup>-1</sup> )                 | 147 (1200 mA g <sup>-1</sup> )                | 45.8%              | 91% after 300 cycles at 720 mA g <sup>-1</sup>  | 8         |
| N-CNSs@MnO <sub>2</sub>                 | 303.7 (0.2 A g <sup>-1</sup> )               | 114.3 (10 A g <sup>-1</sup> )                 | 37.6%              | 81.2% after 200 cycles at 8 A g <sup>-1</sup>   | 2         |
| MnO <sub>2</sub>                        | 171 (1 C)                                    | 87 (30 C)                                     | 50.9%              | □ 30% after 1000 cycles at 20 C                 | 9         |
| MnO <sub>2</sub> -rGO                   | 275 (0.3 A g <sup>-1</sup> )                 | 180 (3 A g <sup>-1</sup> )                    | 65.5%              | □ 74.3% after 500 cycles at 3 A g <sup>-1</sup> | 3         |
| MnO <sub>2</sub>                        | 200 (0.3 A g <sup>-1</sup> )                 | 60 (3 A g <sup>-1</sup> )                     | 30%                | 500 cycles at 0.6 A g <sup>-1</sup>             | 1         |
| MnO <sub>2</sub> /rGO                   | 317 (0.1 A g <sup>-1</sup> )                 | 112 (7.5 A g <sup>-1</sup> )                  | 35.33%             | 76.2% after 600 cycles at 1 A g <sup>-1</sup>   | 4         |
| MnO <sub>2</sub>                        | 264 (0.2 C)                                  | 58 (3 C)                                      | 21.97%             | 99.4% after 1000 cycles at 1 C                  | 10        |
| K <sub>0.28</sub> MnO <sub>2</sub>      | 238 (0.1 A g <sup>-1</sup> )                 | 83 (5 A g <sup>-1</sup> )                     | 35%                | 95% after 1000 cycles at 2 A g <sup>-1</sup>    | 11        |
| α-MnO <sub>2</sub> -C-30                | 298.2 (0.1 A g <sup>-1</sup> )               | 170 (2 A g <sup>-1</sup> )                    | 57%                | □ 33% after 100 cycles at 0.5 A g <sup>-1</sup> | 12        |
| MnO <sub>2</sub> @50GDYO 3D nanoflowers | 265.1 (0.1 C)                                | 80.6 (10 C)                                   | 30.4%              | 77.6% after 1000 cycles at 5 C                  | This work |

1 C = 308 mA h g<sup>-1</sup>

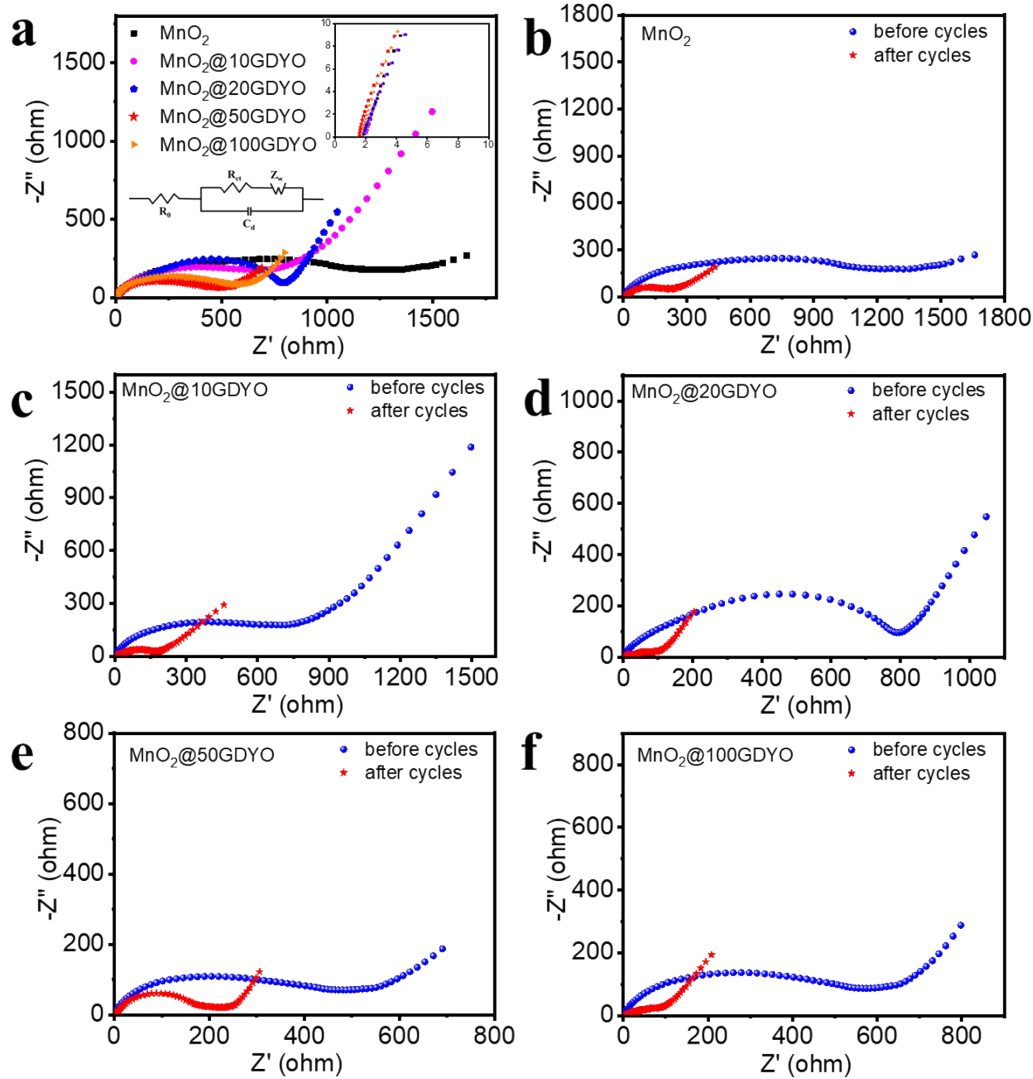

**Fig. S15** Nyquist plots of the impedance spectra of  $\text{MnO}_2$  and  $\text{MnO}_2@\text{GDYO}$  electrodes before and after cycles.

**Tab. S3** Fitting results of  $R_0$ ,  $R_{ct}$  of the EIS based on the equivalent circuit.

| Materials                     | $R_0$ ( $\Omega$ ) | $R_{ct}$ ( $\Omega$ ) |
|-------------------------------|--------------------|-----------------------|
| $\text{MnO}_2$                | 2.23               | 1265                  |
| $\text{MnO}_2@10\text{GDYO}$  | 2.07               | 836                   |
| $\text{MnO}_2@20\text{GDYO}$  | 1.98               | 790                   |
| $\text{MnO}_2@50\text{GDYO}$  | 1.76               | 513                   |
| $\text{MnO}_2@100\text{GDYO}$ | 1.88               | 612                   |

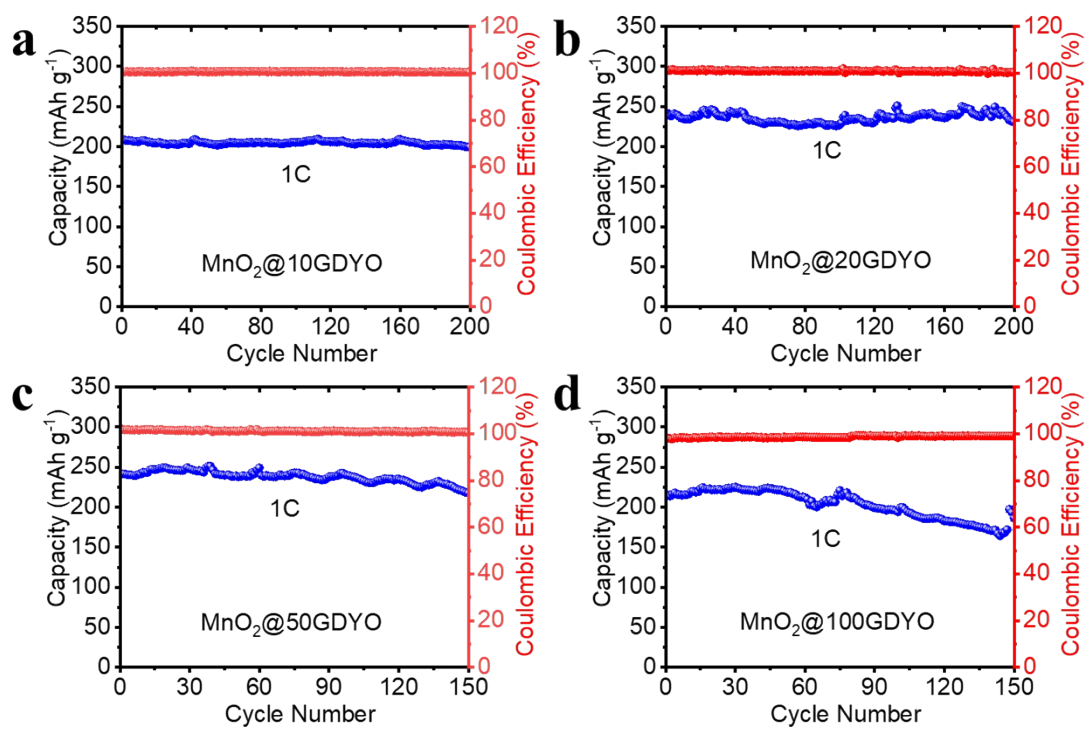

**Fig. S16** Long-term cycling performance of (a) MnO<sub>2</sub>@10GDYO, (b) MnO<sub>2</sub>@20GDYO and (c) MnO<sub>2</sub>@100GDYO electrodes at 1 C after rate performances test.

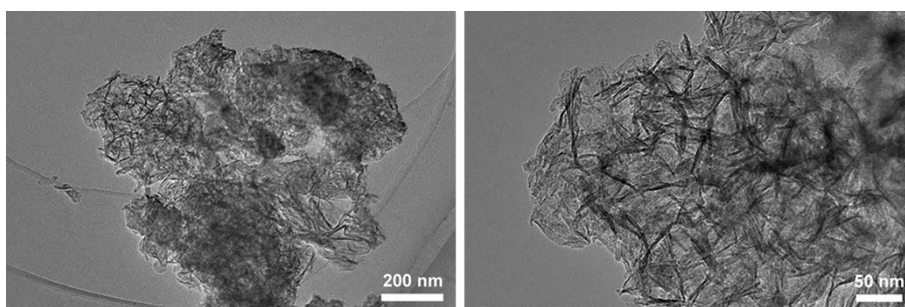

**Fig. S17** TEM images of the MnO<sub>2</sub>@50GDYO hybrid 3D nanoflowers after discharge-charge test.

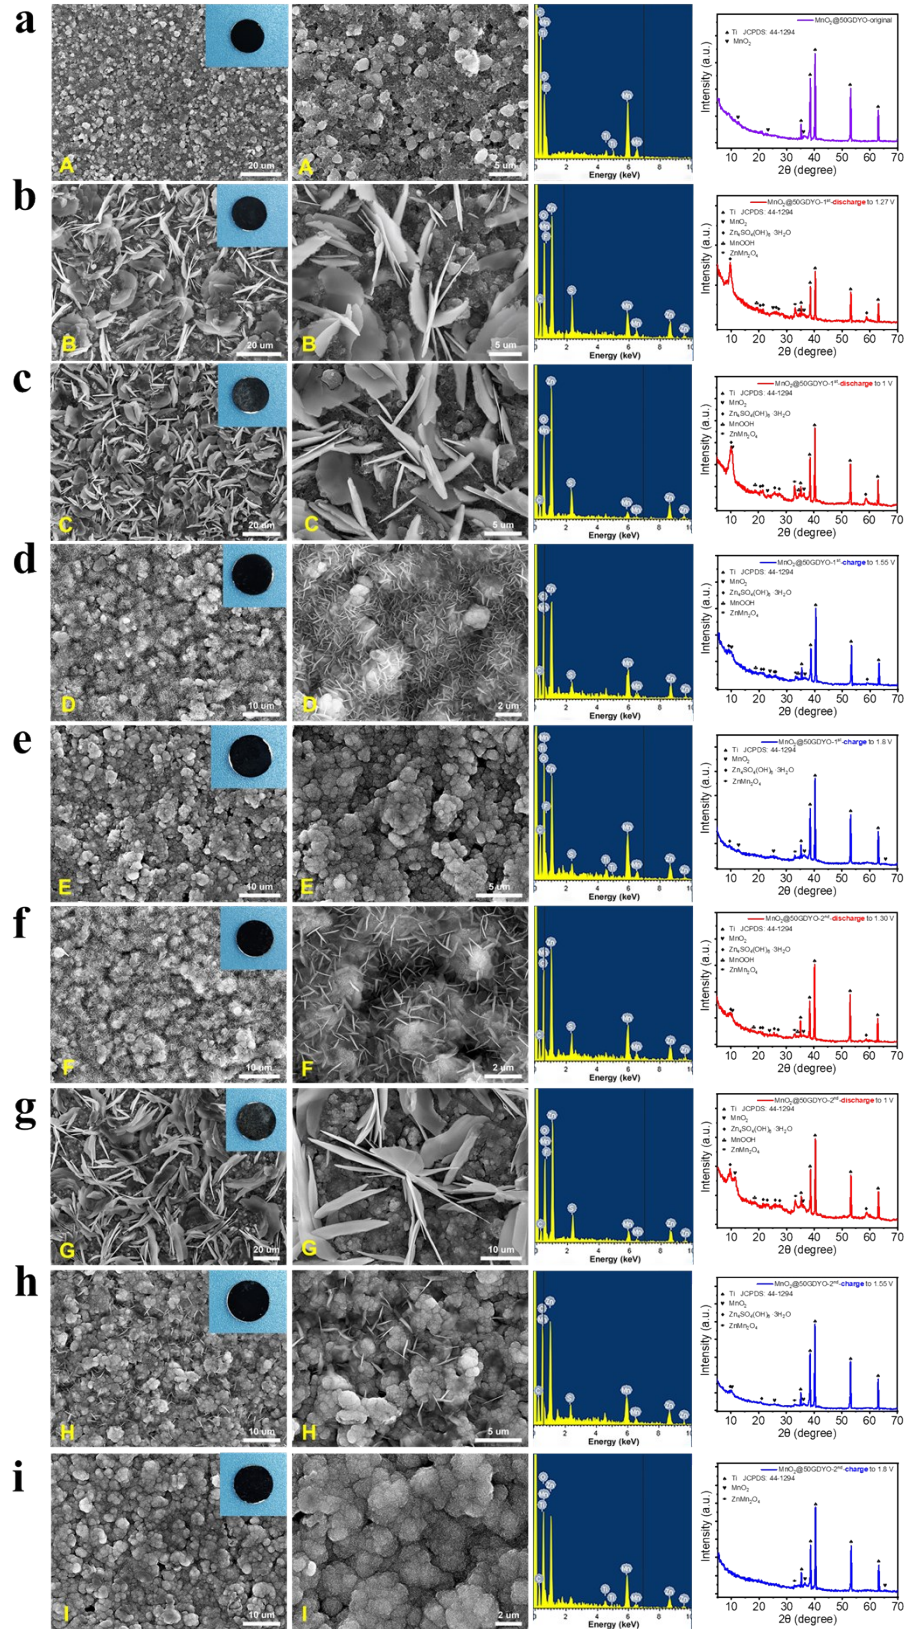

**Fig. S18** Photographs, SEM images and their corresponding elemental mapping, XRD patterns at various states marked in Fig. 5a.

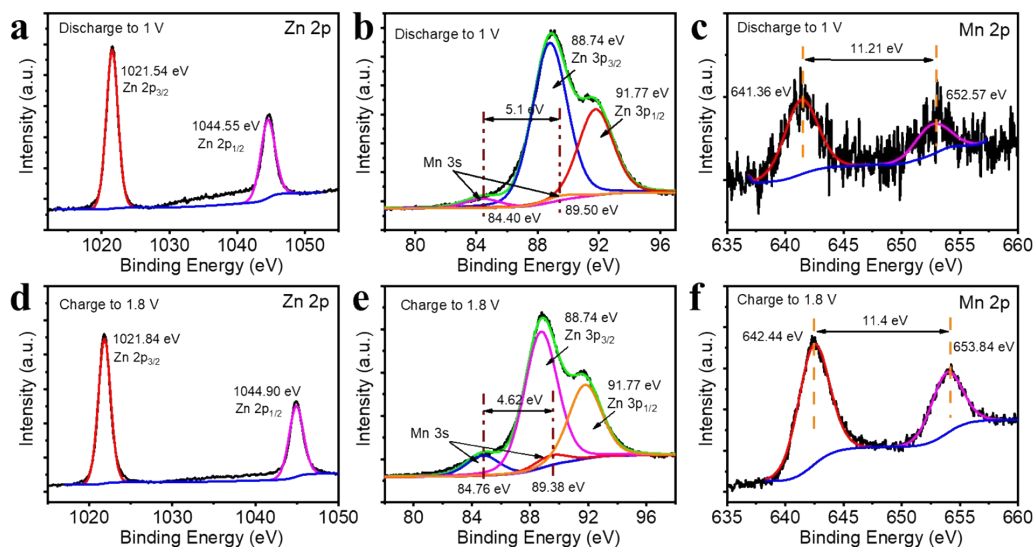

**Fig. S19** XPS narrow scan spectra for element Zn and Mn of MnO<sub>2</sub>@50GDYO electrodes at full discharge and charge state.

With deep discharging to 1.0 V, the splitting of Mn 3s peak ( $\Delta E_s = 5.1$  eV) becomes wider when the valence of Mn in the oxide decreases because of fewer unpaired electrons in the 3d level. Recharging to 1.8 V, the splitting of Mn 3s peak ( $\Delta E_s = 4.62$  eV) becomes narrower when the valence of Mn in the oxide increases.

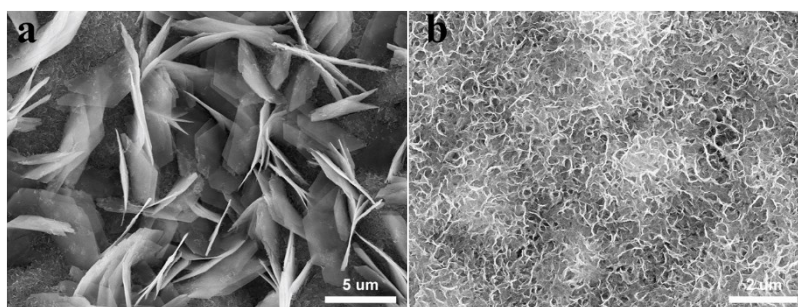

**Fig. S20** SEM images of the MnO<sub>2</sub>@50GDYO cathodes after 1000 cycles (a) discharge state, (b) charge state.

## References

- 1 J. J. Wang, J. G. Wang, X. P. Qin, Y. Wang, Z. Y. You, H. Y. Liu and M. H. Shao, Superfine MnO<sub>2</sub> nanowires with rich defects toward boosted zinc ion storage performance, *ACS Appl. Mater. Interfaces*, 2020, **12**, 34949-34958.
- 2 Y. Zhang, S. J. Deng, Y. H. Li, B. Liu, G. X. Pan, Q. Liu, X. L. Wang, X. H. Xia and J. P. Tu, Anchoring MnO<sub>2</sub> on nitrogen-doped porous carbon nanosheets as flexible arrays cathodes for advanced rechargeable Zn-MnO<sub>2</sub> batteries, *Energy Storage Mater.*, 2020, **29**, 52-59.
- 3 Y. Huang, Z. X. Li, S. Y. Jin, S. D. Zhang, H. L. Wang, P. Hiralal, Gehan A.J. Amaratunga, and H. Zhou, Carbon nanohorns/nanotubes: An effective binary conductive additive in the cathode of high energy-density zinc-ion rechargeable batteries, *Carbon*, 2020, **167**, 431-438.
- 4 J. J. Wang, J. G. Wang, H. Y. Liu, Z. Y. You, Z. Li, F. Y. Kang and B. Q. Wei, A highly flexible and lightweight MnO<sub>2</sub>/Graphene membrane for superior zinc-ion batteries, *Adv. Funct. Mater.*, 2020, **31**, 2007397.
- 5 N. Palaniyandy, M. A. Kebede, K. Raju, K. I. Ozoemena, L. le Roux, M. K. Mathe and R. Jayaprakasam,  $\alpha$ -MnO<sub>2</sub> nanorod/onion-like carbon composite cathode material for aqueous zinc-ion battery, *Mater. Chem. Phys.*, 2019, **230**, 258-266.
- 6 J. J. Wang, J. G. Wang, H. Y. Liu, C. G. Wei and F. Y. Kang, Zinc ion stabilized MnO<sub>2</sub> nanospheres for high capacity and long lifespan aqueous zinc-ion batteries, *J. Mater. Chem. A*, 2019, **7**, 13727-13735.
- 7 M. Q. Liu, Q. H. Zhao, H. Liu, J. L. Yang, X. Chen, L. Y. Yang, Y. H. Cui, W. Y. Huang, W. G. Zhao, A. Y. Song, Y. T. Wang, S. X. Ding, Y. L. Song, G. Y. Qian, H. B. Chen and F. Pan, Tuning phase evolution of  $\beta$ -MnO<sub>2</sub> during microwave hydrothermal synthesis for high-performance aqueous Zn ion battery, *Nano Energy*, 2019, **64**, 103942.
- 8 C. Y. Wang, M. Q. Wang, Z. C. He, L. Liu and Y. D. Huang, Rechargeable aqueous zinc-manganese dioxide/graphene batteries with high rate capability and large capacity, *ACS Appl. Energy Mater.*, 2020, **3**, 1742-1748.
- 9 X. T. Zhang, J. X. Li, H. S. Ao, D. Y. Liu, L. Shi, C. M. Wang, Y. C. Zhu and Y. T.



- Qian, Appropriately hydrophilic/hydrophobic cathode enables high-performance aqueous zinc-ion batteries, *Energy Storage Mater.*, 2020, **30**, 337-345.
- 10 N. Li, G. Q. Li, C. J. Li, H. C. Yang, G. W. Qin, X. D. Sun, F. Li and H. M. Cheng, Bi-cation electrolyte for a 1.7 V aqueous Zn ion battery, *ACS Appl. Mater. Interfaces*, 2020, **12**, 13790-13796.
- 11 Y. D. Jiao, L. Q. Kang, J. B. Gair, K. McColl, J. W. Li, H. B. Dong, H. Jiang, R. Wang, F. Corà, D. J. L. Brett, G. J. He and I. P. Parkin, Enabling stable MnO<sub>2</sub> matrix for aqueous zinc-ion battery cathodes, *J. Mater. Chem. A*, 2020, **8**, 22075-22082.
- 12 X. Gao, H. W. Wu, W. J. Li, Y. Tian, Y. Zhang, H. Wu, L. Yang, G. Q. Zou, H. S. Hou and X. B. Ji, H<sup>+</sup> -insertion boosted alpha-MnO<sub>2</sub> for an aqueous Zn-ion battery, *Small*, 2020, **16**, 1905842.
